# Supplementary material for: Genome-wide identification, characterisation, and evolution of ABF/AREB subfamily in nine Rosaceae species and expression analysis in mei (Prunus mume)
Source: PeerJ. 2021 Feb 4;9:e10785. doi: 10.7717/peerj.10785 (PMC7868070; doi:10.7717/peerj.10785)
Supplement: Supplemental Information 3 [file peerj-09-10785-s003.xlsx]

## Sheet: Table S1
Table S1:
Genome information of the nine Rosaceae species
Common name	Species name	Release version	Genome Size (Mb)	Gene ID
woodland strawberry	Fragaria vesca	v4.0.a2	240	FvH4
rose	Rosa Chinensis ‘Old Blush’	v2.0	514.8	RcHm
black raspberry	Rubus occidentalis	v3.0	290	Ro
mei	Prunus mume	v1.0	280	Pm
almond	Prunus dulcis ‘Texas’	v2.0	240	Prudul
peach	Prunus persica	v2.0.a1	265	Prupe.
apricot	Prunus armeniaca	v1.0	221.9	PARG
wild pear	Pyrus betulifolia	v1.0	532.7	GWHPAAYT
apple	Malus domestica ‘HF’	HFTH1v1.0.a1	708.54	HF
