# Supplementary material for: Genome-wide identification, characterisation, and evolution of ABF/AREB subfamily in nine Rosaceae species and expression analysis in mei (Prunus mume)
Source: PeerJ. 2021 Feb 4;9:e10785. doi: 10.7717/peerj.10785 (PMC7868070; doi:10.7717/peerj.10785)
Supplement: Supplemental Information 4 [file peerj-09-10785-s004.xlsx]

## Sheet: Sheet1
Table S2：
Sequence information of the ABF/AREB subfamily members of nine Rosaceae species.
Species	Gene Name	Gene ID	Locus: Strand	Start-End(bp)	CDS (bp)	LEN (aa)	MW(kDa)	pI
Prunus mume	PmABF1	Pm001315	Pm01:+	8980754-8981918	1062	353	39165.4	4.96
Prunus mume	PmABF2	Pm001671	Pm01:+	12352454-12354723	795	264	29799.4	5.6
Prunus mume	PmABF3	Pm005288	Pm02:+	10209439-10212583	1260	419	45002.7	9.68
Prunus mume	PmABF4	Pm016826	Pm05:+	5026990-5029433	1089	362	40508.9	6.48
Prunus mume	PmABF5	Pm019140	Pm05:+	22358173-22359422	954	317	35915.5	6.47
Prunus mume	PmABF6	Pm021430	Pm06:+	8736879-8739336	1287	428	46393.1	9.6
Prunus mume	PmABF7	Pm026185	Pm08:-	8292928-8296994	1845	614	67202.5	7.6
Prunus dulcis	PdABF1	Prudul26A015519P2	Pd01:-	33862831-33866899	1254	417	44722.2	9.68
Prunus dulcis	PdABF2	Prudul26A003886P1	Pd01:+	38218709-38219958	954	317	35678.1	7.12
Prunus dulcis	PdABF3	Prudul26A006138P1	Pd02:-	6151910-6159045	969	322	35948.6	7.68
Prunus dulcis	PdABF4	Prudul26A006554P1	Pd06:+	10226653-10229278	1152	383	42629.3	5.34
Prunus dulcis	PdABF5	Prudul26A013919P3	Pd06:+	13763874-13770590	834	277	31147.9	7.07
Prunus dulcis	PdABF6	Prudul26A010424P3	Pd07:-	12659810-12663755	1416	471	51437.4	6.18
Prunus dulcis	PdABF7	Prudul26A003353P1	Pd08:+	12631942-12635868	1290	429	46628.3	9.82
Prunus persica	PpABF1	Prupe.1G434500.1	Pp01:-	37142086-37147800	1260	419	44894.4	9.68
Prunus persica	PpABF2	Prupe.1G508200.1	Pp01:+	41925717-41927036	948	315	35525.9	6.73
Prunus persica	PpABF3	Prupe.2G056800.1	Pp02:-	6770564-6777727	969	322	35935.6	7.68
Prunus persica	PpABF4	Prupe.6G128900.1	Pp06:+	9997930-10000923	1287	428	47969.8	5.63
Prunus persica	PpABF5	Prupe.6G156000.1	Pp06:+	13711821-13718592	834	277	31093.8	7.79
Prunus persica	PpABF6	Prupe.7G112200.1	Pp07:-	13860173-13864219	1350	449	48896.5	7.24
Prunus persica	PpABF7	Prupe.8G126600.1	Pp08:+	15093869-15097724	1266	421	45790.4	9.82
Prunus armeniaca	ParABF1	PARG01253m01	LG1:-	9277174-9280059	1143	380	42215.9	5.43
Prunus armeniaca	ParABF2	PARG01652m08	LG1:+	12820832-12831536	1635	544	60756.3	5.62
Prunus armeniaca	ParABF3	PARG07789m01	LG2:-	32345700-32348843	1260	419	44882.4	9.68
Prunus armeniaca	ParABF4	PARG08477m01	LG2:+	36934593-36940050	1500	499	54930	4.29
Prunus armeniaca	ParABF5	PARG16952m01	LG5:-	6411897-6419092	968	322	35962.6	7.68
Prunus armeniaca	ParABF6	PARG21224m01	LG6:-	8415067-8417851	1290	429	46576.3	9.75
Prunus armeniaca	ParABF7	PARG26717m05	LG8:+	11994400-11998243	1344	447	48434.9	6.29
Malus domestica	MdABF1	HF06639-RA	Chr02:+	32939413-32944567	969	322	36032.7	5.94
Malus domestica	MdABF2	HF40741-RA	Chr03:+	14860045-14863183	1119	372	41395.2	6.38
Malus domestica	MdABF3	HF22621-RA	Chr05:+	17733595-17735972	1296	431	46567.5	9.62
Malus domestica	MdABF4	HF16540-RA	Chr07:-	4886502-4890437	969	322	35813.5	6.26
Malus domestica	MdABF5	HF21639-RA	Chr08:-	7865689-7868247	1257	418	45091.6	9.21
Malus domestica	MdABF6	HF07122-RA	Chr08:+	21060137-21061539	918	305	34056.3	9.1
Malus domestica	MdABF7	HF36455-RA	Chr12:+	2263208-2291579	3291	1096	122004	9.17
Malus domestica	MdABF8	HF20012-RA	Chr14:+	2221489-2227679	2391	796	88776.6	9.17
Malus domestica	MdABF9	HF13033-RA	Chr15:-	5636607-5639085	1260	419	45085.7	9.78
Pyrus betulifolia	PbABF1	GWHTAAYT033687	Chr02:+	22281530-22289404	969	322	36053.6	5.71
Pyrus betulifolia	PbABF2	GWHTAAYT035580	Chr03:+	12789639-12792743	1119	372	41345	5.92
Pyrus betulifolia	PbABF3	GWHTAAYT041522	Chr05:+	14115783-14119665	1329	442	47942.1	9.56
Pyrus betulifolia	PbABF4	GWHTAAYT047627	Chr07:-	3479730-3485574	966	321	35870.5	5.94
Pyrus betulifolia	PbABF5	GWHTAAYT051518	Chr08:-	6366849-6369078	903	300	32851	9.78
Pyrus betulifolia	PbABF6	GWHTAAYT010062	Chr12:+	2086542-2089211	1320	439	47730.3	7.07
Pyrus betulifolia	PbABF7	GWHTAAYT016780	Chr14:-	2491165-2495473	1326	441	47788.3	7.73
Pyrus betulifolia	PbABF8	GWHTAAYT020219	Chr15:-	4878782-4882175	1251	416	44736.3	9.67
Pyrus betulifolia	PbABF9	GWHTAAYT024152	Chr15:-	43481338-43535774	873	290	31824.4	5.84
Rosa_chinensis	RcABF1	RcHm_v2.0_Chr1g0330441	Chr1:-	20155270-20161536	963	320	35632.3	8.39
Rosa_chinensis	RcABF2	RcHm_v2.0_Chr3g0473071	Chr3:+	19069549-19071587	1329	442	48621.4	7.67
Rosa_chinensis	RcABF3	RcHm_v2.0_Chr5g0044361	Chr5:+	39684601-39686251	1062	353	38444.6	5.16
Rosa_chinensis	RcABF4	RcHm_v2.0_Chr5g0044371	Chr5:+	39689926-39691920	1035	344	37606.6	5.31
Rosa_chinensis	RcABF5	RcHm_v2.0_Chr6g0257641	Chr6:+	13036154-13039989	1299	432	46913.5	9.55
Rosa_chinensis	RcABF6	RcHm_v2.0_Chr6g0308031	Chr6:+	66180782-66184734	1323	440	47132.7	9.73
Rubus occidentalis	RoABF1	Ro02_G00599	Ro02:+	3405371-3409737	1305	434	46786.5	9.64
Rubus occidentalis	RoABF2	Ro02_G21448	Ro02:+	37090219-37094586	1344	447	48642.7	9.82
Rubus occidentalis	RoABF3	Ro03_G32501	Ro03:-	25730598-25734023	1116	371	40753.4	6.36
Rubus occidentalis	RoABF4	Ro05_G24744	Ro05:-	40057695-40058829	894	297	33663.7	6.6
Rubus occidentalis	RoABF5	Ro06_G14893	Ro06:+	35139639-35143550	1359	452	49302.1	6.19
Rubus occidentalis	RoABF6	Ro07_G13594	Ro07:-	24633428-24640736	1083	360	39865	8.29
Fragaria vesca	FvABF1	FvH4_2g05900.1	Fvb2:-	4890065-4894031	1299	432	46987.6	9.54
Fragaria vesca	FvABF2	FvH4_2g34330.1	Fvb2:-	25531294-25535090	1188	395	41352	9.72
Fragaria vesca	FvABF3	FvH4_3g24800.1	Fvb3:+	17900383-17901338	930	309	33411.7	5.11
Fragaria vesca	FvABF4	FvH4_5g30210.1	Fvb5:+	21121087-21123927	834	277	29886.5	6.21
Fragaria vesca	FvABF5	FvH4_6g18510.1	Fvb6:+	12261720-12265065	1323	440	48283.8	7.7
Fragaria vesca	FvABF6	FvH4_7g04850.1	Fvb7:-	5272659-5278349	978	325	36359.1	8.79
