# Supplementary material for: Genome-wide identification, characterisation, and evolution of ABF/AREB subfamily in nine Rosaceae species and expression analysis in mei (Prunus mume)
Source: PeerJ. 2021 Feb 4;9:e10785. doi: 10.7717/peerj.10785 (PMC7868070; doi:10.7717/peerj.10785)
Supplement: Supplemental Information 6 [file peerj-09-10785-s006.xlsx]

## Sheet: Sheet1
Table S5:
The Ka/Ks values of ABF/AREB subfamily genes in Prunus mume vs. other eight Rosaceae species
Seq 1	Seq 2	Ka	Ks	Ka/Ks	divergence time(Mya)
PmABF1	PmABF2	0.6281	1.8715	0.335613	62.3833
PmABF1	PmABF5	0.5189	2.8876	0.179699	96.2533
PmABF2	PmABF3	0.3796	2.1924	0.173144	73.08
PmABF2	PmABF5	0.4443	2.9146	0.152439	97.1533
PmABF3	PmABF4	0.1697	2.0211	0.0839642	67.37
PmABF3	PmABF6	0.1115	1.3291	0.0838914	44.3033
PmABF3	PmABF7	0.1602	1.806	0.0887043	60.2
PmABF4	PmABF7	0.2429	2.6622	0.0912403	88.74
PdABF7	PdABF1	0.1115	1.3291	0.0838914	44.3033
PdABF2	PdABF4	0.4738	2.171	0.21824	72.3667
PdABF2	PdABF5	0.4553	4.2202	0.107886	140.673
PdABF3	PdABF4	0.3852	2.4314	0.158427	81.0467
PdABF3	PdABF5	0.2808	3.6987	0.0759186	123.29
PdABF3	PdABF1	0.1697	1.7034	0.0996243	56.78
PdABF4	PdABF5	0.6191	1.5167	0.408189	50.5567
PdABF6	PdABF1	0.1696	1.8397	0.0921889	61.3233
PdABF5	PdABF1	0.3912	2.3167	0.168861	77.2233
PpABF3	PpABF5	0.2705	3.1138	0.0868713	103.793
PpABF3	PpABF4	0.3852	2.4314	0.158427	81.0467
PpABF3	PpABF1	0.1697	2.0211	0.0839642	67.37
PpABF7	PpABF1	0.1115	1.3291	0.0838914	44.3033
PpABF5	PpABF4	0.6039	1.4772	0.408814	49.24
PpABF5	PpABF1	0.3732	2.4816	0.150387	82.72
PpABF4	PpABF2	0.4738	2.171	0.21824	72.3667
PpABF6	PpABF1	0.1696	1.8397	0.0921889	61.3233
ParABF2	ParABF3	0.3796	2.1924	0.173144	73.08
ParABF2	ParABF4	0.4443	2.9146	0.152439	97.1533
ParABF2	ParABF5	1.4019	1.1752	1.1929	39.1733
ParABF3	ParABF5	1.2141	1.7973	0.675513	59.91
ParABF3	ParABF6	0.1115	1.3291	0.0838914	44.3033
ParABF3	ParABF7	0.1696	1.8397	0.0921889	61.3233
ParABF4	ParABF5	1.1136	2.6566	0.419182	88.5533
ParABF5	ParABF6	1.2141	2.1545	0.563518	71.8167
MdABF1	MdABF3	0.2236	1.1189	0.199839	37.2967
MdABF1	MdABF4	0	0.0272	0	0.906667
MdABF1	MdABF5	0.2018	1.3844	0.145767	46.1467
MdABF1	MdABF9	0.1759	0.9926	0.177211	33.0867
MdABF3	MdABF4	0.2236	1.1189	0.199839	37.2967
MdABF3	MdABF5	0.1359	1.095	0.12411	36.5
MdABF3	MdABF7	0.2138	2.1033	0.10165	70.11
MdABF3	MdABF9	0.0978	1.1678	0.0837472	38.9267
MdABF4	MdABF5	0.2018	1.3844	0.145767	46.1467
MdABF4	MdABF9	0.1759	0.9926	0.177211	33.0867
MdABF6	MdABF7	0.4686	2.0822	0.22505	69.4067
MdABF5	MdABF7	0.2323	1.0841	0.214279	36.1367
MdABF5	MdABF8	0.2115	1.3438	0.157389	44.7933
MdABF5	MdABF9	0.0354	0.099	0.357576	3.3
MdABF7	MdABF8	0.0236	0.1108	0.212996	3.69333
MdABF7	MdABF9	0.2033	1.5492	0.131229	51.64
MdABF8	MdABF9	0.1834	1.5492	0.118384	51.64
PbABF6	PbABF7	0.0236	0.1419	0.166314	4.73
PbABF6	PbABF8	0.1841	1.7161	0.107278	57.2033
PbABF6	PbABF9	0.3807	3.4905	0.109067	116.35
PbABF6	PbABF2	0.2658	2.3932	0.111065	79.7733
PbABF6	PbABF3	0.209	3.2958	0.063414	109.86
PbABF6	PbABF5	0.2013	1.0841	0.185684	36.1367
PbABF7	PbABF8	0.1789	1.8938	0.0944662	63.1267
PbABF7	PbABF9	0.4305	1.9955	0.215735	66.5167
PbABF7	PbABF2	0.2599	2.9362	0.0885158	97.8733
PbABF7	PbABF5	0.191	1.2158	0.157098	40.5267
PbABF8	PbABF9	0.3704	1.8996	0.194988	63.32
PbABF8	PbABF1	0.1765	1.0737	0.164385	35.79
PbABF8	PbABF3	0.1071	1.8787	0.0570075	62.6233
PbABF8	PbABF4	0.1858	1.3711	0.135512	45.7033
PbABF8	PbABF5	0.0275	0.0978	0.281186	3.26
PbABF9	PbABF3	0.3806	1.6752	0.227197	55.84
PbABF9	PbABF4	0.4382	3.7462	0.116972	124.873
PbABF9	PbABF5	0.3929	1.6479	0.238425	54.93
PbABF1	PbABF3	0.2396	1.4762	0.162309	49.2067
PbABF1	PbABF4	0.0077	0.1162	0.0662651	3.87333
PbABF1	PbABF5	0.1918	1.1086	0.173011	36.9533
PbABF3	PbABF4	0.2389	1.5188	0.157295	50.6267
PbABF3	PbABF5	0.1224	1.2734	0.0961206	42.4467
PbABF4	PbABF5	0.2012	1.4206	0.14163	47.3533
RcABF1	RcABF5	0.2889	2.1293	0.135678	70.9767
RcABF1	RcABF6	0.1975	1.8919	0.104392	63.0633
RcABF2	RcABF3	0.2401	1.47	0.163333	49
RcABF2	RcABF4	0.196	1.3663	0.143453	45.5433
RcABF3	RcABF4	0.1014	0.2642	0.3838	8.80667
RcABF5	RcABF6	0.1018	1.1588	0.0878495	38.6267
RoABF5	RoABF4	0.9604	1.2225	0.785603	40.75
RoABF5	RoABF3	1.0839	1.7363	0.624258	57.8767
RoABF5	RoABF1	1.3359	1.212	1.10223	40.4
RoABF5	RoABF2	1.5065	1.4864	1.01352	49.5467
RoABF4	RoABF6	1.5114	2.0276	0.745413	67.5867
RoABF4	RoABF1	1.2327	1.4618	0.843275	48.7267
RoABF4	RoABF2	1.1436	1.8019	0.634663	60.0633
RoABF1	RoABF2	0.0808	1.0347	0.0780903	34.49
FvABF5	FvABF1	1.2516	3.0742	0.40713	102.473
FvABF5	FvABF2	1.2134	1.817	0.667804	60.5667
FvABF5	FvABF6	1.181	1.5323	0.770737	51.0767
FvABF5	FvABF4	1.5812	2.3646	0.668697	78.82
FvABF1	FvABF2	0.1035	1.0143	0.102041	33.81
FvABF1	FvABF6	0.2785	2.031	0.137125	67.7
FvABF2	FvABF6	0.1866	1.7171	0.108672	57.2367
