# Supplementary material for: Genome-wide identification, characterisation, and evolution of ABF/AREB subfamily in nine Rosaceae species and expression analysis in mei (Prunus mume)
Source: PeerJ. 2021 Feb 4;9:e10785. doi: 10.7717/peerj.10785 (PMC7868070; doi:10.7717/peerj.10785)
Supplement: Supplemental Information 7 [file peerj-09-10785-s007.xlsx]

## Sheet: Sheet2
Table S6:
The cis-elements in the promoters of PmABFs genes
Gene	Site name	Sequence	Number	Function
PmABF1	chs-CMA1a	TTACTTAA	1	part of a light responsive element
	ATC-motif	AGTAATCT	1	part of a conserved DNA module involved in light responsiveness
	GT1-motif	GGTTAA	1	light responsive element
	AAAC-motif	CAATCAAAACCT	1	light responsive element
	G-Box	CACGTT	2	cis-acting regulatory element involved in light responsiveness
		TAAACGTG	1
	ABRE	ACGTG	2	cis-acting element involved in the abscisic acid responsiveness
	TATC-box	TATCCCA	1	cis-acting element involved in gibberellin-responsiveness
	TCA-element	TCAGAAGAGG	2	cis-acting element involved in salicylic acid responsiveness
	TGA-element	AACGAC	1	auxin-responsive element
	O2-site	GTTGACGTGA	1	cis-acting regulatory element involved in zein metabolism regulation
	MBS	CAACTG	2	MYB binding site involved in drought-inducibility
	LTR	CCGAAA	1	cis-acting element involved in low-temperature responsiveness
	ARE	AAACCA	2	cis-acting regulatory element essential for the anaerobic induction
	MBSI	TTTTTACGGTTA	1	MYB binding site involved in flavonoid biosynthetic genes regulation
PmABF2	ACA-motif	AATCACAACCATA	1	part of gapA in (gapA-CMA1) involved with light responsiveness
	AE-box	AGAAACAA	2	part of a module for light response
	Gap-box	CAAATGAA(A/G)A	1	part of a light responsive element
	Box 4	ATTAAT	5	part of a conserved DNA module involved in light responsiveness
	ATCT-motif	AATCTAATCC	1	part of a conserved DNA module involved in light responsiveness
	GT1-motif	GGTTAA	1	light responsive element
	P-box	CCTTTTG	1	gibberellin-responsive element
	GARE-motif	TCTGTTG	1	gibberellin-responsive element
	TGACG-motif	TGACG	1	cis-acting regulatory element involved in the MeJA-responsiveness
	CGTCA-motif	CGTCA	1	cis-acting regulatory element involved in the MeJA-responsiveness
	TCA-element	CCATCTTTTT	1	cis-acting element involved in salicylic acid responsiveness
	TGA-element	AACGAC	2	auxin-responsive element
	MBS	CAACTG	2	MYB binding site involved in drought-inducibility
	ARE	AAACCA	4	cis-acting regulatory element essential for the anaerobic induction
	TC-rich repeats	ATTCTCTAAC	1	cis-acting element involved in defense and stress responsiveness
	A-box	AATAACAAACTCC	1	sequence conserved in alpha-amylase promoters
	MBSI	TTTTTACGGTTA	1	MYB binding site involved in flavonoid biosynthetic genes regulation
	AACA_motif	TAACAAACTCCA	1	involved in endosperm-specific negative expression
PmABF3	AE-box	AGAAACTT	1	part of a module for light response
	Gap-box	CAAATGAA(A/G)A	1	part of a light responsive element
	Box 4	ATTAAT	1	part of a conserved DNA module involved in light responsiveness
	Sp1	GGGCGG	1	light responsive element
	G-Box	CACGTT	1	cis-acting regulatory element involved in light responsiveness
		CACGTG	2
		CACGTC	1
		CACGTGAAA	1
		GCCACGTGGA	1
	ABRE	ACGTG	3	cis-acting element involved in the abscisic acid responsiveness
		CACGTG	1
		AACCCGG	1
		GACACGTGGC	1
	GARE-motif	TCTGTTG	3	gibberellin-responsive element
	CGTCA-motif	CGTCA	2	cis-acting regulatory element involved in the MeJA-responsiveness
	TGACG-motif	TGACG	2	cis-acting regulatory element involved in the MeJA-responsiveness
	TGA-element	AACGAC	1	auxin-responsive element
	O2-site	GATGATGTGG	1	cis-acting regulatory element involved in zein metabolism regulation
	MBS	CAACTG	1	MYB binding site involved in drought-inducibility
	ARE	AAACCA	1	cis-acting regulatory element essential for the anaerobic induction
	CCAAT-box	CAACGG	1	MYBHv1 binding site
PmABF4	TCT-motif	TCTTAC	1	part of a light responsive element
	Box 4	ATTAAT	3	part of a conserved DNA module involved in light responsiveness
	MRE	AACCTAA	1	MYB binding site involved in light responsiveness
	P-box	CCTTTTG	1	gibberellin-responsive element
	GARE-motif	TCTGTTG	2	gibberellin-responsive element
	CGTCA-motif	CGTCA	1	cis-acting regulatory element involved in the MeJA-responsiveness
	TGACG-motif	TGACG	1	cis-acting regulatory element involved in the MeJA-responsiveness
	TCA-element	CCATCTTTTT	1	cis-acting element involved in salicylic acid responsiveness
	MBS	CAACTG	1	MYB binding site involved in drought-inducibility
	ARE	AAACCA	3	cis-acting regulatory element essential for the anaerobic induction
	RY-element	CATGCATG	1	cis-acting regulatory element involved in seed-specific regulation
	circadian	CAAAGATATC	1	cis-acting regulatory element involved in circadian control
PmABF5	I-box	TGATAATGT	1	part of a light responsive element
	Box 4	ATTAAT	1	part of a conserved DNA module involved in light responsiveness
	G-Box	TCCACATGGCA	1	cis-acting regulatory element involved in light responsiveness
		CACGTT	1	cis-acting regulatory element involved in light responsiveness
	P-box	CCTTTTG	2	gibberellin-responsive element
	TATC-box	TATCCCA	2	cis-acting element involved in gibberellin-responsiveness
	CGTCA-motif	CGTCA	1	cis-acting regulatory element involved in the MeJA-responsiveness
	TGACG-motif	TGACG	1	cis-acting regulatory element involved in the MeJA-responsiveness
	TCA-element	CCATCTTTTT	1	cis-acting element involved in salicylic acid responsiveness
	MBS	CAACTG	1	MYB binding site involved in drought-inducibility
	LTR	CCGAAA	1	cis-acting element involved in low-temperature responsiveness
	ARE	AAACCA	5	cis-acting regulatory element essential for the anaerobic induction
	MBSI	TTTTTACGGTTA	1	MYB binding site involved in flavonoid biosynthetic genes regulation
	CAT-box	GCCACT	1	cis-acting regulatory element related to meristem expression
	circadian	CAAAGATATC	1	cis-acting regulatory element involved in circadian control
PmABF6	MRE	AACCTAA	1	MYB binding site involved in light responsiveness
	TCT-motif	TCTTAC	2	part of a light responsive element
	Gap-box	CAAATGAA(A/G)A	1	part of a light responsive element
	TCCC-motif	TCTCCCT	1	part of a light responsive element
	GT1-motif	GGTTAA	1	light responsive element
	AAAC-motif	CAATCAAAACCT	2	light responsive element
	G-box	CACGTC	1	cis-acting regulatory element involved in light responsiveness
		CACGTT	1
	ACE	CTAACGTATT	1	cis-acting element involved in light responsiveness
	ABRE	ACGTG	2	cis-acting element involved in the abscisic acid responsiveness
	GARE-motif	TCTGTTG	1	gibberellin-responsive element
	LTR	CCGAAA	3	cis-acting element involved in low-temperature responsiveness
	ARE	AAACCA	4	cis-acting regulatory element essential for the anaerobic induction
	CCAAT-box	CAACGG	1	MYBHv1 binding site
	CAT-box	GCCACT	1	cis-acting regulatory element related to meristem expression
PmABF7	AE-box	AGAAACAA	1	part of a module for light response
	GATA-motif	AAGGATAAGG	1	part of a light responsive element
	Box 4	ATTAAT	2	part of a conserved DNA module involved in light responsiveness
	MRE	AACCTAA	1	MYB binding site involved in light responsiveness
	GT1-motif	GGTTAAT	1	light responsive element
	G-Box	CACGTG	6	cis-acting regulatory element involved in light responsiveness
		CACGTC	1
		TACGTG	1
		ACACGTGT	1
	ABRE	CACGTG	3	cis-acting element involved in the abscisic acid responsiveness
		ACGTG	5
		GACACGTGGC	1
	CGTCA-motif	CGTCA	2	cis-acting regulatory element involved in the MeJA-responsiveness
	TGACG-motif	TGACG	2	cis-acting regulatory element involved in the MeJA-responsiveness
	TCA-element	CCATCTTTTT	1	cis-acting element involved in salicylic acid responsiveness
	LTR	CCGAAA	1	cis-acting element involved in low-temperature responsiveness
	CAT-box	GCCACT	1	cis-acting regulatory element related to meristem expression
